# Supplementary material for: Impact of Time to Surgery on Outcome in Wilms Tumor Treated with Preoperative Chemotherapy
Source: Cancers (Basel). 2023 Feb 27;15(5):1494. doi: 10.3390/cancers15051494 (PMC10001069; doi:10.3390/cancers15051494)
Supplement: Supplementary file 1 [file cancers-15-01494-s001.zip]

Archive with 12 entries (12 files):
- Figure S1.pdf
- __MACOSX/._Figure S1.pdf
- Figure S2.pdf
- __MACOSX/._Figure S2.pdf
- Figure S3.pdf
- __MACOSX/._Figure S3.pdf
- Figure S4.pdf
- __MACOSX/._Figure S4.pdf
- Figure S5.pdf
- __MACOSX/._Figure S5.pdf
- Figure S6.pdf
- __MACOSX/._Figure S6.pdf
