# Supplementary material for: Impact of Time to Surgery on Outcome in Wilms Tumor Treated with Preoperative Chemotherapy
Source: Cancers (Basel). 2023 Feb 27;15(5):1494. doi: 10.3390/cancers15051494 (PMC10001069; doi:10.3390/cancers15051494)

**A** Relapses in Unilateral Wilms Tumor

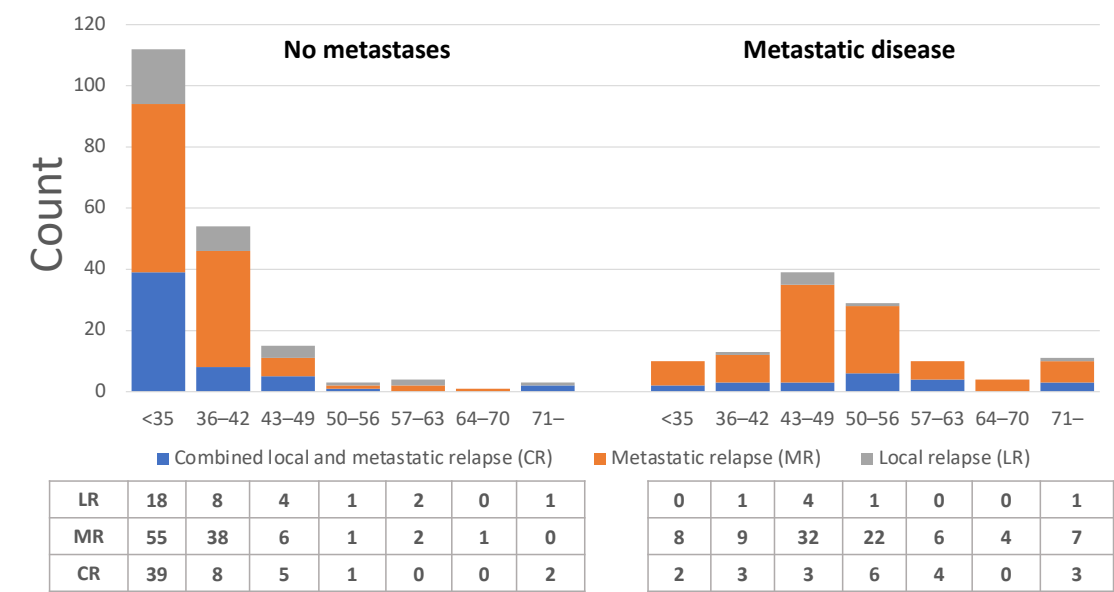

**B** Relapses in Bilateral Wilms Tumor

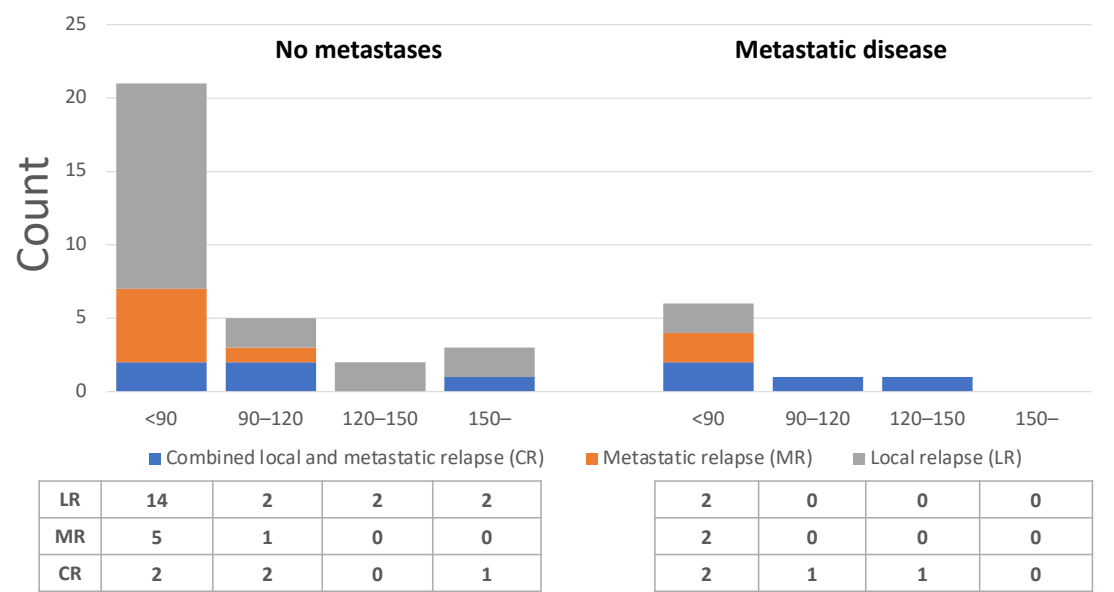

**C** Mortality in Unilateral Wilms Tumor

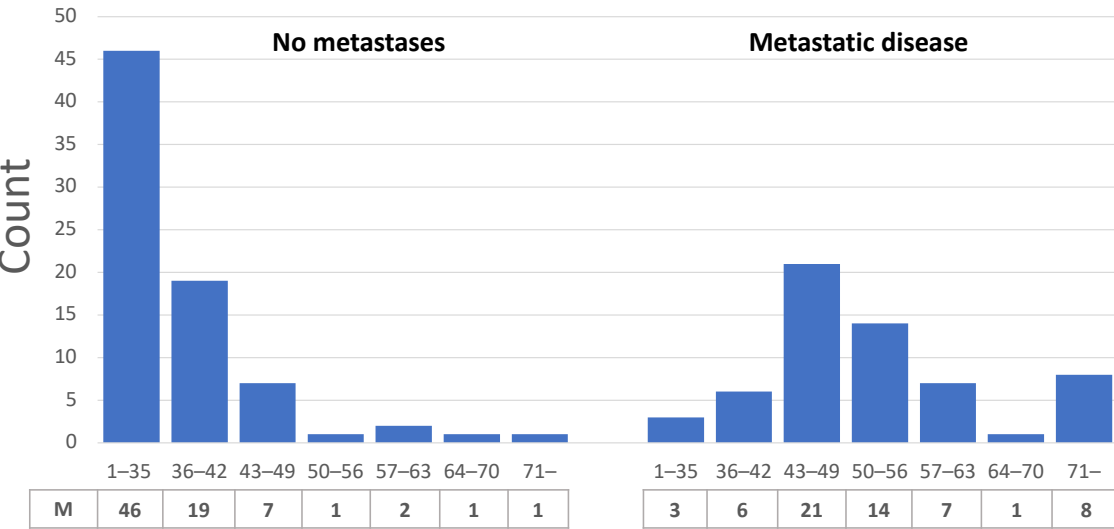

**D** Mortality in Bilateral Wilms Tumor

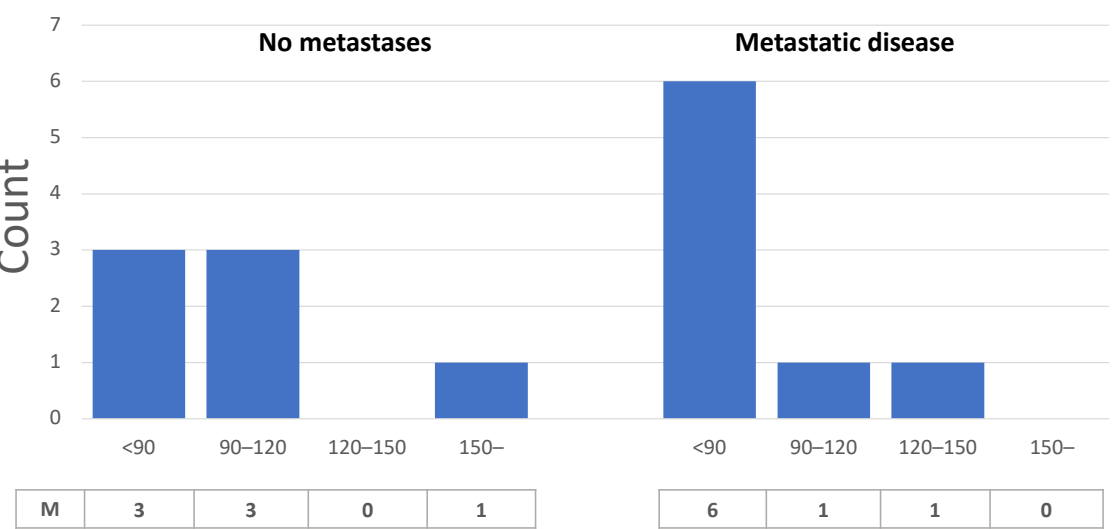

Supplement: Supplementary file 1 [file cancers-15-01494-s001.zip › Figure S2.pdf]
